# Supplementary material for: Exploring the relationship between video game expertise and fluid intelligence
Source: PLOS journal article supplement (doi:10.1371/journal.pone.0186621), 2017-11-15
Supplement: S6 (10.1371/journal.pone.0186621.s006) [file journal.pone.0186621.s006]

## Supplementary Material – 6

### Tasks

Visual depictions of the tasks are presented here for visualisation processes. See (Foster et al.,2014) (DOI 10.3758/s13421-014-0461-7) for the a more exact representation of the tasks.

### OSPAN

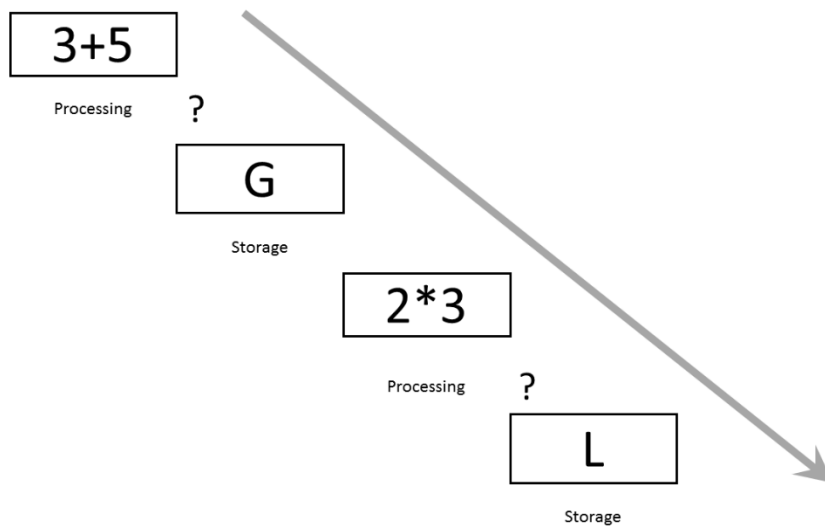

**S6 Fig 1 – Visual depiction of the ospan task**

### SYMSPAN

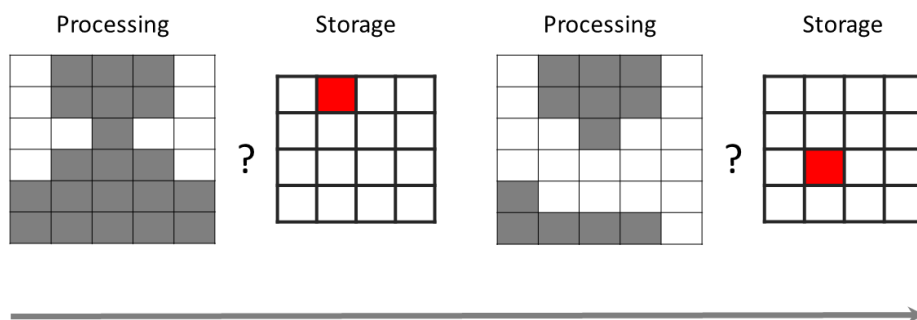

**S6 Fig 2 – Visual depiction of the symspan task**

## ROTSPAN

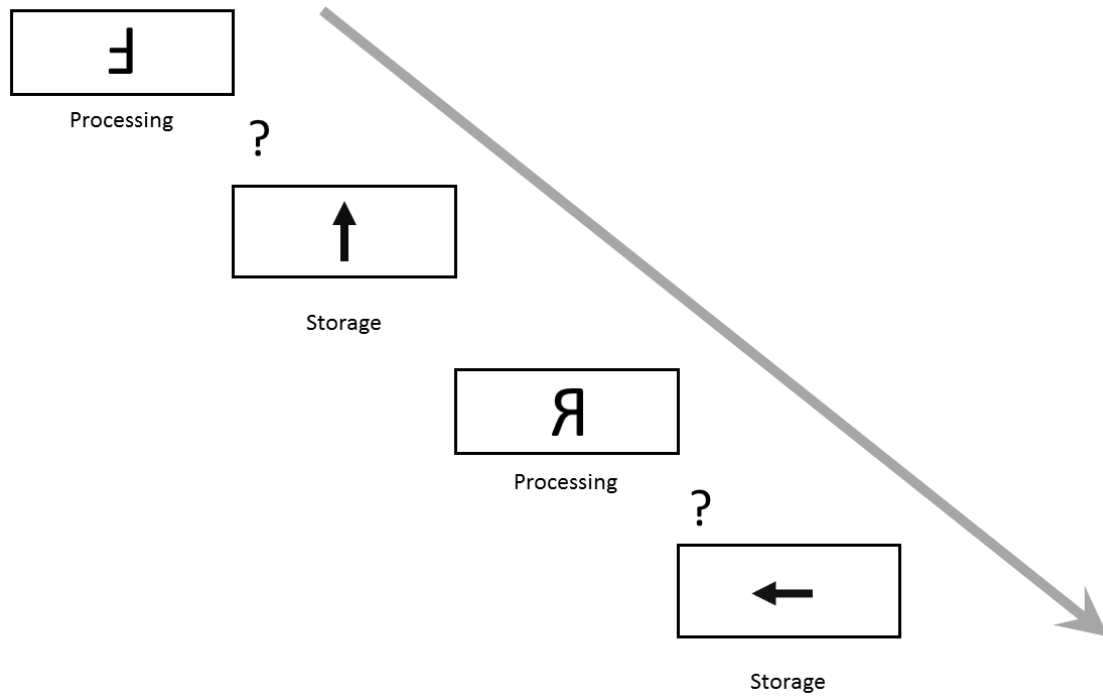

**S6 Fig 3 – Visual depiction of the rotspace task**
